# Supplementary material for: Public Engagement Provides First Insights on Po Plain Ant Communities and Reveals the Ubiquity of the Cryptic Species Tetramorium immigrans (Hymenoptera, Formicidae)
Source: PubMed Central journal article supplement (PMC7601173; doi:10.3390/insects11100678), 2020-10-07
Supplement: insects-11-00678-s001.pdf [file insects-11-00678-s001.pdf]

**Supplementary material to: Castracani, C.; Spotti, F.A.; Schifani, E.; Giannetti, D.; Ghizzoni, M.; Grasso, D.A.; Mori, A. Citizen science provides first insights on Po Plain ant communities and reveals the ubiquity of the cryptic invader *Tetramorium immigrans* (Hymenoptera, Formicidae)**

**Table S1.** List of the 12 parks of the A.R.E.A. Parchi network involved in the project. The last column shows the number of sampled sites.

| <b>Park Name</b>      | <b>Website address</b>                                                                                                                                                                                                                                                                                                                                                              | <b>Sites</b> |
|-----------------------|-------------------------------------------------------------------------------------------------------------------------------------------------------------------------------------------------------------------------------------------------------------------------------------------------------------------------------------------------------------------------------------|--------------|
| Adda Nord             | <a href="http://www.parcoaddanord.it/">http://www.parcoaddanord.it/</a>                                                                                                                                                                                                                                                                                                             | 1            |
| Basso Brembo          | <a href="http://www.parcobassobrembo.it/">http://www.parcobassobrembo.it/</a>                                                                                                                                                                                                                                                                                                       | 1            |
| Bosco Fontana         | <a href="https://www.carabinieri.it/arma/oggi/organizzazione/organizzazione-per-la-tutela-forestale-ambientale-e-agroalimentare/utcb-e-le-130-riserve-naturali/utcb-di-verona/bosco-fontana">https://www.carabinieri.it/arma/oggi/organizzazione/organizzazione-per-la-tutela-forestale-ambientale-e-agroalimentare/utcb-e-le-130-riserve-naturali/utcb-di-verona/bosco-fontana</a> | 1            |
| Campo dei Fiori       | <a href="http://www.parcocampodeifiori.it/">http://www.parcocampodeifiori.it/</a>                                                                                                                                                                                                                                                                                                   | 1            |
| Groane                | <a href="http://www.parcogroane.it/">http://www.parcogroane.it/</a>                                                                                                                                                                                                                                                                                                                 | 1            |
| Monte Barro           | <a href="http://www.parcobarro.lombardia.it/_parco/">http://www.parcobarro.lombardia.it/_parco/</a>                                                                                                                                                                                                                                                                                 | 2            |
| Monte Canto e Bedesco | <a href="http://www.comitatomontecanto.it/">http://www.comitatomontecanto.it/</a>                                                                                                                                                                                                                                                                                                   | 1            |
| Nord Milano           | <a href="https://parconord.milano.it/">https://parconord.milano.it/</a>                                                                                                                                                                                                                                                                                                             | 1            |
| Oglio Sud - Le Bine   | <a href="http://www.ogliosud.it/pagina.php?id=14">http://www.ogliosud.it/pagina.php?id=14</a>                                                                                                                                                                                                                                                                                       | 1            |
| Serio                 | <a href="https://www.parcodelserio.it/">https://www.parcodelserio.it/</a>                                                                                                                                                                                                                                                                                                           | 1            |
| Valle Lambro          | <a href="https://www.parcovallelambro.it/">https://www.parcovallelambro.it/</a>                                                                                                                                                                                                                                                                                                     | 2            |
| Valpredina-Misma      | <a href="https://www.valpredina.eu/">https://www.valpredina.eu/</a>                                                                                                                                                                                                                                                                                                                 | 1            |

**Table S2.** Species checklist according to sites. For each species, the % of baits in which they were found is expressed (StdDataset). A cross marks the species only present in the FDataset. Colors correspond to the clusters found in the NMDS analysis: orange = group 1, green = group 2 and red = group 3. Fiori Park is in white because it was excluded from StdDataset (see text for further details).

| Specie            | Add | Gro | NMi | LaCa | Bre | Ser | LBin | CaBe | Fon | BCa | BEr | LaBr | VaM | Fiori |
|-------------------|-----|-----|-----|------|-----|-----|------|------|-----|-----|-----|------|-----|-------|
| <i>T. subb.</i>   |     | 2   |     |      | +   | 2   |      | 3    | 2   |     |     |      |     |       |
| <i>C. fallax</i>  | 2   |     |     |      |     |     |      |      | 2   |     |     |      |     |       |
| <i>C. later.</i>  |     |     |     |      |     |     |      |      |     | 2   |     |      |     |       |
| <i>C. lignip.</i> |     |     |     |      |     |     |      |      |     |     | 5   |      |     |       |
| <i>F. clara</i>   |     |     |     |      |     |     | 2    |      |     |     |     |      |     |       |
| <i>F. cunic.</i>  | 2   | 2   |     | 6    | 2   | 2   | +    |      | 2   | 7   |     | 2    | 2   | +     |
| <i>F. gagat.</i>  |     |     |     |      |     |     |      |      |     | 7   | 2   |      |     |       |
| <i>L. distin.</i> |     | 4   |     |      |     |     |      |      |     |     |     |      |     |       |
| <i>L. emarg.</i>  | 8   | 4   | 2   |      |     |     | 4    |      |     | 15  | 10  | 10   | 2   | +     |
| <i>L. fulig.</i>  |     | +   |     |      |     |     |      |      |     |     |     |      |     |       |
| <i>L. niger</i>   | 4   | 10  | 4   | 12   | 8   | +   |      | 3    |     | 2   | 5   |      |     | +     |
| <i>L. paral.</i>  |     | 4   | +   |      |     |     |      |      |     |     |     | 2    |     |       |
| <i>P. pygm.</i>   |     | 4   | +   |      | 8   |     | 2    |      |     | 2   |     |      |     | +     |
| <i>A. subter.</i> |     |     |     | 3    |     |     |      |      | 2   | 12  | 7   | 2    | 6   | +     |
| <i>C. scutel.</i> |     | 2   | +   |      | +   |     | 4    |      |     |     |     | 2    |     |       |
| <i>M. iberic.</i> |     |     |     |      |     |     |      |      | 2   |     |     |      |     |       |
| <i>M. mon.</i>    |     |     |     |      |     |     | 12   |      | 14  |     |     |      |     |       |
| <i>M. hell.</i>   |     | +   | +   |      |     |     |      |      |     |     |     |      |     | 2     |
| <i>M. rubr.</i>   |     |     |     |      |     | 6   |      |      |     |     |     | 2    | 4   |       |
| <i>M. sabul.</i>  | 2   |     |     |      | +   | 2   | 10   | 12   | 4   | 2   |     |      |     | +     |
| <i>M. spec.</i>   |     |     |     | 3    | +   |     |      |      |     | 5   | 2   |      | 2   |       |
| <i>P. pallid.</i> |     |     |     |      |     |     |      |      |     | 12  |     |      | 2   |       |
| <i>S. fugax</i>   |     |     | 6   |      |     | 2   |      | 3    | 2   |     |     |      |     |       |
| <i>T. flavic.</i> |     |     |     |      |     | +   |      |      |     |     |     |      |     |       |
| <i>T. licht.</i>  |     |     |     |      | 2   |     |      |      |     | 2   |     |      |     | +     |
| <i>T. nylan.</i>  |     |     |     |      |     |     |      |      |     |     |     |      |     | 2     |
| <i>T. parvul.</i> |     |     |     |      |     |     |      |      |     |     |     | 2    |     |       |
| <i>T. unifas.</i> |     | 2   |     | 3    | 2   |     | 8    |      | 2   | 2   | 7   |      | 6   |       |
| <i>T. caesp.</i>  | 2   |     | 2   |      |     | +   | +    |      |     | 2   | 2   | 7    | 4   |       |
| <i>T. immig.</i>  | 43  | 4   | 12  | 12   | 18  | 4   | 10   | 9    | 8   | 10  | 5   | 10   | 4   | +     |

**Table S3.** Values of Sørensen-Dice similarity index for all the possible comparisons between parks (StdDataset). Colors correspond to the clusters found in the NMDS analysis: orange = group 1, green = group 2 and red = group 3.

|      | Add  | Gro  | NMi  | LaCa | Bre  | Ser  | LBin | CaBe | Fon  | BCa  | BEr  | LaBr | VaM  | Mean |
|------|------|------|------|------|------|------|------|------|------|------|------|------|------|------|
| Add  | -    | 0.47 | 0.66 | 0.46 | 0.57 | 0.44 | 0.40 | 0.50 | 0.47 | 0.57 | 0.50 | 0.50 | 0.46 | 0.50 |
| Gro  | 0.47 | -    | 0.40 | 0.47 | 0.59 | 0.37 | 0.55 | 0.40 | 0.40 | 0.50 | 0.42 | 0.53 | 0.38 | 0.43 |
| NMi  | 0.66 | 0.40 | -    | 0.36 | 0.50 | 0.36 | 0.31 | 0.60 | 0.27 | 0.42 | 0.40 | 0.28 | 0.35 | 0.41 |
| LaCa | 0.46 | 0.47 | 0.36 | -    | 0.46 | 0.33 | 0.28 | 0.36 | 0.50 | 0.60 | 0.67 | 0.40 | 0.55 | 0.45 |
| Bre  | 0.57 | 0.59 | 0.50 | 0.46 | -    | 0.31 | 0.40 | 0.33 | 0.35 | 0.66 | 0.50 | 0.37 | 0.44 | 0.46 |
| Ser  | 0.44 | 0.37 | 0.36 | 0.33 | 0.31 | -    | 0.28 | 0.73 | 0.67 | 0.30 | 0.13 | 0.40 | 0.33 | 0.39 |
| LBin | 0.40 | 0.55 | 0.31 | 0.28 | 0.40 | 0.28 | -    | 0.15 | 0.44 | 0.45 | 0.35 | 0.35 | 0.31 | 0.35 |
| CaBe | 0.50 | 0.40 | 0.60 | 0.36 | 0.33 | 0.73 | 0.15 | -    | 0.53 | 0.31 | 0.28 | 0.14 | 0.12 | 0.39 |
| Fon  | 0.47 | 0.40 | 0.27 | 0.50 | 0.35 | 0.67 | 0.44 | 0.53 | -    | 0.42 | 0.31 | 0.31 | 0.38 | 0.41 |
| BCa  | 0.57 | 0.50 | 0.42 | 0.60 | 0.66 | 0.30 | 0.36 | 0.31 | 0.42 | -    | 0.69 | 0.43 | 0.64 | 0.50 |
| BEr  | 0.50 | 0.42 | 0.40 | 0.67 | 0.50 | 0.13 | 0.35 | 0.28 | 0.31 | 0.69 | -    | 0.44 | 0.50 | 0.43 |
| LaBr | 0.50 | 0.53 | 0.28 | 0.40 | 0.37 | 0.40 | 0.35 | 0.14 | 0.31 | 0.43 | 0.44 | -    | 0.50 | 0.47 |
| VaM  | 0.46 | 0.38 | 0.35 | 0.55 | 0.44 | 0.33 | 0.31 | 0.12 | 0.38 | 0.64 | 0.50 | 0.50 | -    | 0.41 |
